# Supplementary material for: Prognostic Factors of the Inability to Bear Self-Weight at Discharge in Patients with Fragility Femoral Neck Fracture: A 5-Year Retrospective Cohort Study in Thailand
Source: MDPI journal article supplement (doi:10.3390/ijerph19073992), 2022-03-28
Supplement: s1 [file s1]

**Supplementary Table S1:** Power back calculation based on the current sample size and the required number of samples needed to reach statistical significance for each prognostic variable.

|                                                                      | Unable to bear<br>self-weight at<br>discharge (n=55)<br>n (%) | Able to bear self-<br>weight at<br>discharge (n=214)<br>n (%) | p-value          | Power | Required<br>Sample size* | Adequate<br>sample size |
|----------------------------------------------------------------------|---------------------------------------------------------------|---------------------------------------------------------------|------------------|-------|--------------------------|-------------------------|
| <b>Sex</b>                                                           |                                                               |                                                               |                  |       |                          |                         |
| - Male                                                               | 19 (34.55)                                                    | 57 (26.64)                                                    | 0.245            | 0.266 | 1,267                    | No                      |
| - Female                                                             | 36 (65.45)                                                    | 157 (73.36)                                                   |                  |       |                          |                         |
| <b>Age ≥ 80 years</b>                                                | 27 (49.09)                                                    | 100 (46.73)                                                   | 0.764            | 0.069 | 17,000                   | No                      |
| <b>BMI ≥ 25 kg/m<sup>2</sup></b>                                     | 8 (14.81)                                                     | 41 (19.34)                                                    | 0.557            | 0.128 | 2,668                    | No                      |
| <b>Underlying diseases</b>                                           |                                                               |                                                               |                  |       |                          |                         |
| - ESRD                                                               | 11 (20.00)                                                    | 13 (6.07)                                                     | <b>0.003</b>     | 0.844 | 195                      | Yes                     |
| - Cirrhosis                                                          | 3 (5.45)                                                      | 0 (0)                                                         | <b>0.008</b>     | 0.710 | 263                      | Yes                     |
| - Cerebrovascular diseases                                           | 10 (18.18)                                                    | 17 (7.94)                                                     | <b>0.040</b>     | 0.616 | 377                      | No                      |
| - Psychiatric disorders/Drug abuse                                   | 6 (10.91)                                                     | 5 (2.34)                                                      | <b>0.011</b>     | 0.718 | 269                      | Yes                     |
| - Parkinson disease                                                  | 2 (3.64)                                                      | 6 (2.80)                                                      | 0.668            | 0.078 | 16,400                   | No                      |
| - Diabetes mellitus                                                  | 12 (21.82)                                                    | 48 (22.43)                                                    | 1.000            | 0.058 | 176,000                  | No                      |
| - Heart diseases                                                     | 12 (21.82)                                                    | 36 (16.82)                                                    | 0.430            | 0.178 | 2,319                    | No                      |
| - COPD/Asthma                                                        | 5 (9.09)                                                      | 15 (7.01)                                                     | 0.571            | 0.094 | 6,345                    | No                      |
| - Eye diseases                                                       | 4 (7.27)                                                      | 16 (7.48)                                                     | 1.000            | 0.078 | 590,000                  | No                      |
| - Cancer                                                             | 3 (5.45)                                                      | 16 (7.48)                                                     | 0.773            | 0.061 | 5,719                    | No                      |
| - Dementia                                                           | 5 (9.09)                                                      | 19 (8.88)                                                     | 1.000            | 0.078 | 703,000                  | No                      |
| <b>Pre-fracture ambulation status</b>                                |                                                               |                                                               |                  |       |                          |                         |
| - Independent ambulation                                             | 29 (52.73)                                                    | 166 (77.57)                                                   | <b>&lt;0.001</b> | 0.958 | 130                      | Yes                     |
| - Ambulation with gait aids                                          | 22 (40.00)                                                    | 48 (22.43)                                                    |                  | 0.778 | 251                      | Yes                     |
| - Ambulation in wheelchair                                           | 2 (3.64)                                                      | 0 (0)                                                         |                  | 0.557 | 412                      | No                      |
| - Non-ambulatory status                                              | 2 (3.64)                                                      | 0 (0)                                                         |                  | 0.557 | 412                      | No                      |
| <b>Hypoalbuminemia (&lt;3.5 g/dl)</b>                                | 23 (50.00)                                                    | 48 (26.97)                                                    | <b>0.004</b>     | 0.919 | 161                      | Yes                     |
| <b>Associated fracture</b>                                           | 10 (18.18)                                                    | 2 (0.93)                                                      | <b>&lt;0.001</b> | 0.982 | 83                       | Yes                     |
| <b>Second hip fracture</b>                                           | 6 (10.91)                                                     | 20 (9.35)                                                     | 0.798            | 0.068 | 14,000                   | No                      |
| <b>Surgical technique</b>                                            |                                                               |                                                               |                  |       |                          |                         |
| - Arthroplasty                                                       | 41 (74.55)                                                    | 165 (77.10)                                                   | 0.722            | 0.081 | 10,600                   | No                      |
| - Fixation                                                           | 14 (25.45)                                                    | 49 (22.90)                                                    |                  | 0.081 |                          |                         |
| <b>Time delayed from admission to surgery &gt;48 hours</b>           | 51 (92.73)                                                    | 174 (81.31)                                                   | 0.042            | 0.597 | 344                      | No                      |
| <b>Anesthesia time (hours) <sup>a</sup></b>                          | 2.17 (1.92, 2.50)                                             | 2.00 (1.75, 2.25)                                             | 0.010‡           | 0.588 | 296                      | No                      |
| <b>Intra-operative blood loss (ml) <sup>a</sup></b>                  | 100 (50, 200)                                                 | 100 (90, 200)                                                 | 0.712‡           | 0.368 | 488                      | No                      |
| <b>Post-operative ICU admission or ventilator used</b>               | 10 (18.18)                                                    | 4 (1.87)                                                      | <0.001           | 0.966 | 101                      | Yes                     |
| <b>Major post-operative complications</b>                            | 9 (16.36)                                                     | 5 (2.34)                                                      | <0.001           | 0.926 | 132                      | Yes                     |
| <b>Other operation in admission</b>                                  | 5 (9.09)                                                      | 4 (1.87)                                                      | 0.020            | 0.657 | 317                      | No                      |
| <b>Post-operative sedative drug used</b>                             | 28 (50.91)                                                    | 58 (27.10)                                                    | 0.001            | 0.933 | 151                      | Yes                     |
| <b>Post-operative blood transfusion</b>                              | 18 (32.73)                                                    | 50 (23.36)                                                    | 0.166            | 0.355 | 851                      | No                      |
| <b>Urinary catheter used at post-operative day 2</b>                 | 22 (40.00)                                                    | 38 (17.76)                                                    | 0.001            | 0.935 | 146                      | Yes                     |
| <b>Moderate to severe pain score at rehabilitation day (PS=4-10)</b> | 7 (14.29)                                                     | 30 (14.56)                                                    | 1.000            | 0.068 | 645,000                  | No                      |
| <b>Pressure sore</b>                                                 | 3 (5.45)                                                      | 1 (0.47)                                                      | 0.028            | 0.605 | 343                      | No                      |

‡ Mann-Whitney U test, <sup>a</sup> Median (IQR), \* Required sample size for event and non-event to achieve 80% power
